# Supplementary material for: In vivo calcium imaging from dentate granule cells with wide-field fluorescence microscopy
Source: PubMed Central journal article supplement (PMC5507494; doi:10.1371/journal.pone.0180452), 2017-07-12

Supplemental Figure 2

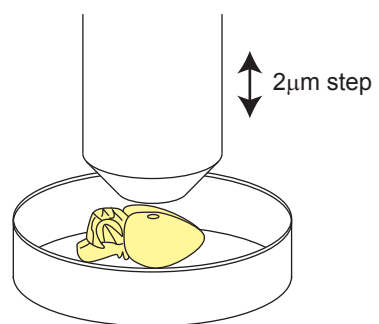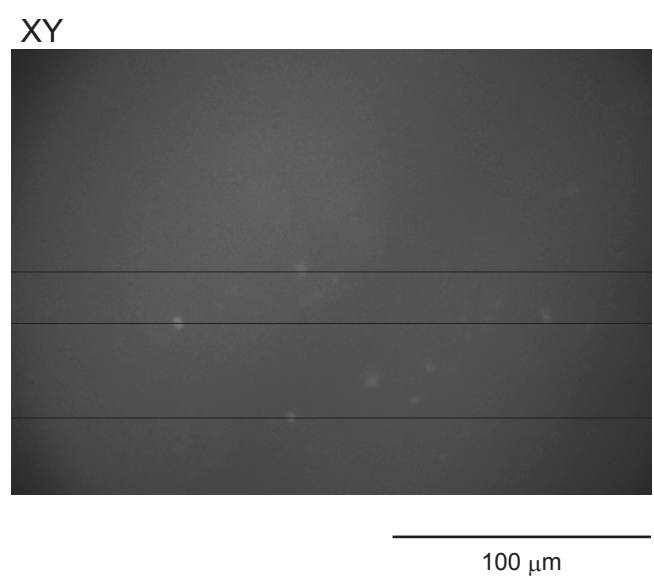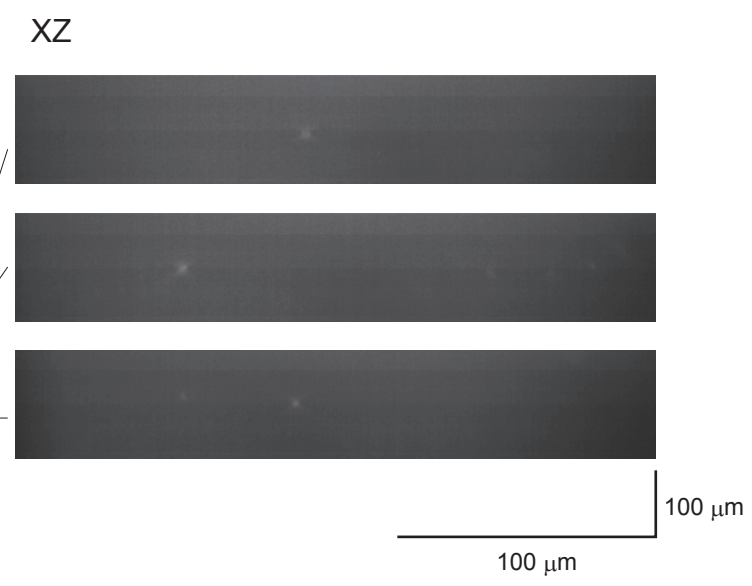

Supplement: pone.0180452.s002.pdf [file pone.0180452.s002.pdf]
